# Supplementary material for: Double oxidation localizes spin in a Ni bis-phenoxyl radical complex
Source: Royal Society of Chemistry journal article supplement (doi:10.1039/c2dt32632a), 2013-01-01
Supplement: c2dt32632a.pdf [file c2dt32632a.pdf]

## SUPPORTING INFORMATION

### Double Oxidation Localizes Spin in a Ni Bis-Phenoxy Radical Complex

Tim J. Dunn, Michael I. Webb, Khatera Hazin, Pratik Verma, Erik C. Wasinger, Yuichi Shimazaki, and Tim Storr

#### Supporting Figures

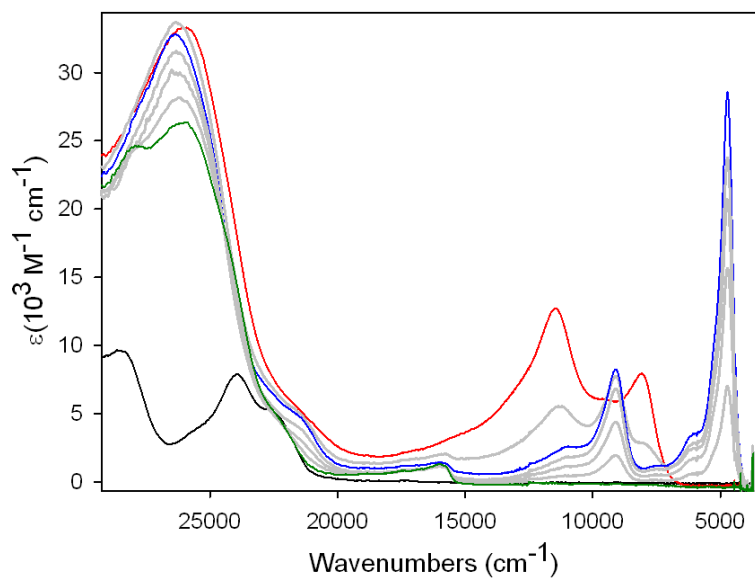

**Fig S1.** Titration of  $[1^{\bullet\bullet}]^{2+}$  (red) to  $[1^{\bullet}]^+$  (blue) with one equivalent of Ferrocene.  $[1^{\bullet}]^+$  was recovered in quantitative yield providing evidence for the stability of  $[1^{\bullet\bullet}]^{2+}$  under these conditions. Further titration of  $[1^{\bullet}]^+$  (blue) to 1 (green) also shown. Conditions: 0.25 mM complex in  $\text{CH}_2\text{Cl}_2$ , 198 K.

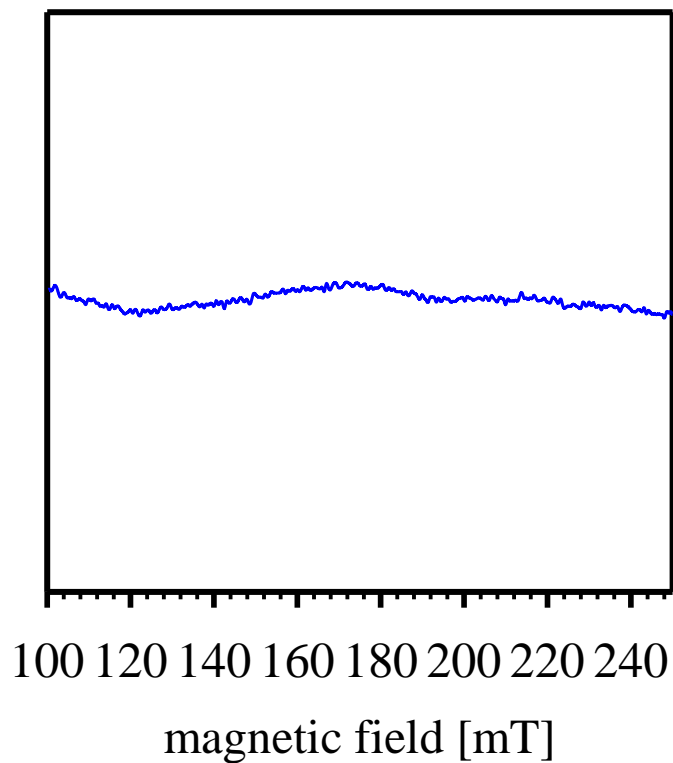

**Fig S2. Expansion of the X-Band EPR spectrum for  $[1^{\bullet\bullet}]^{2+}$  in the half-field region showing a lack of signal. Conditions: 0.33 mM; frequency, 9.384 GHz; power, 2.0 mW; modulation frequency, 100 kHz; amplitude, 0.6 mT; T = 20 K.**

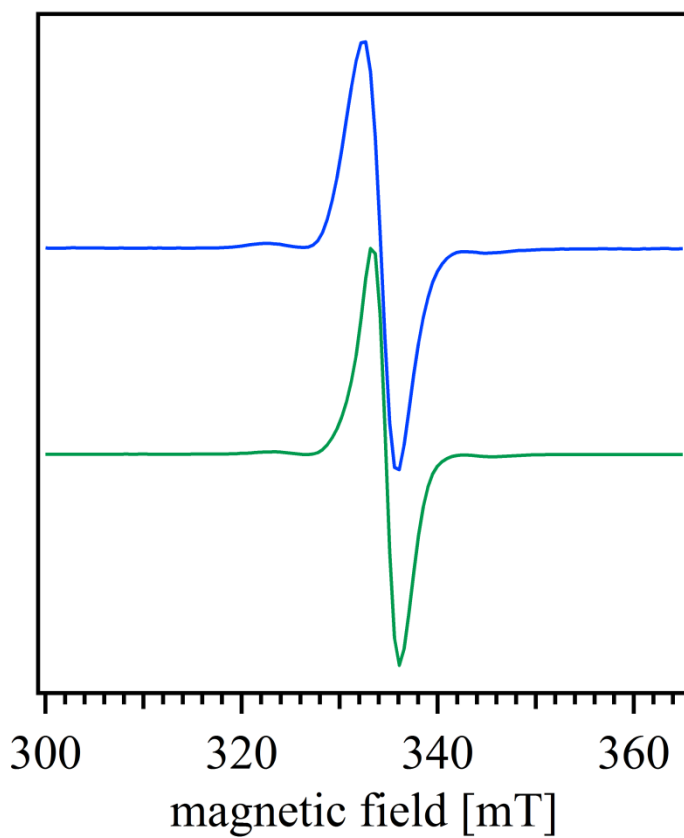

**Fig S3. Comparison of  $[1^{\bullet\bullet}]^{2+}$  and chemical oxidant. X-Band EPR spectrum of  $[1^{\bullet\bullet}]^{2+}$  in  $\text{CH}_2\text{Cl}_2$  solution (blue line) and chemical oxidant spectrum (green). Both spectra were normalized for comparison. Conditions: frequency, 9.384 GHz; power, 2.0 mW; modulation frequency, 100 kHz; amplitude, 0.6 mT;  $T = 20$  K.**

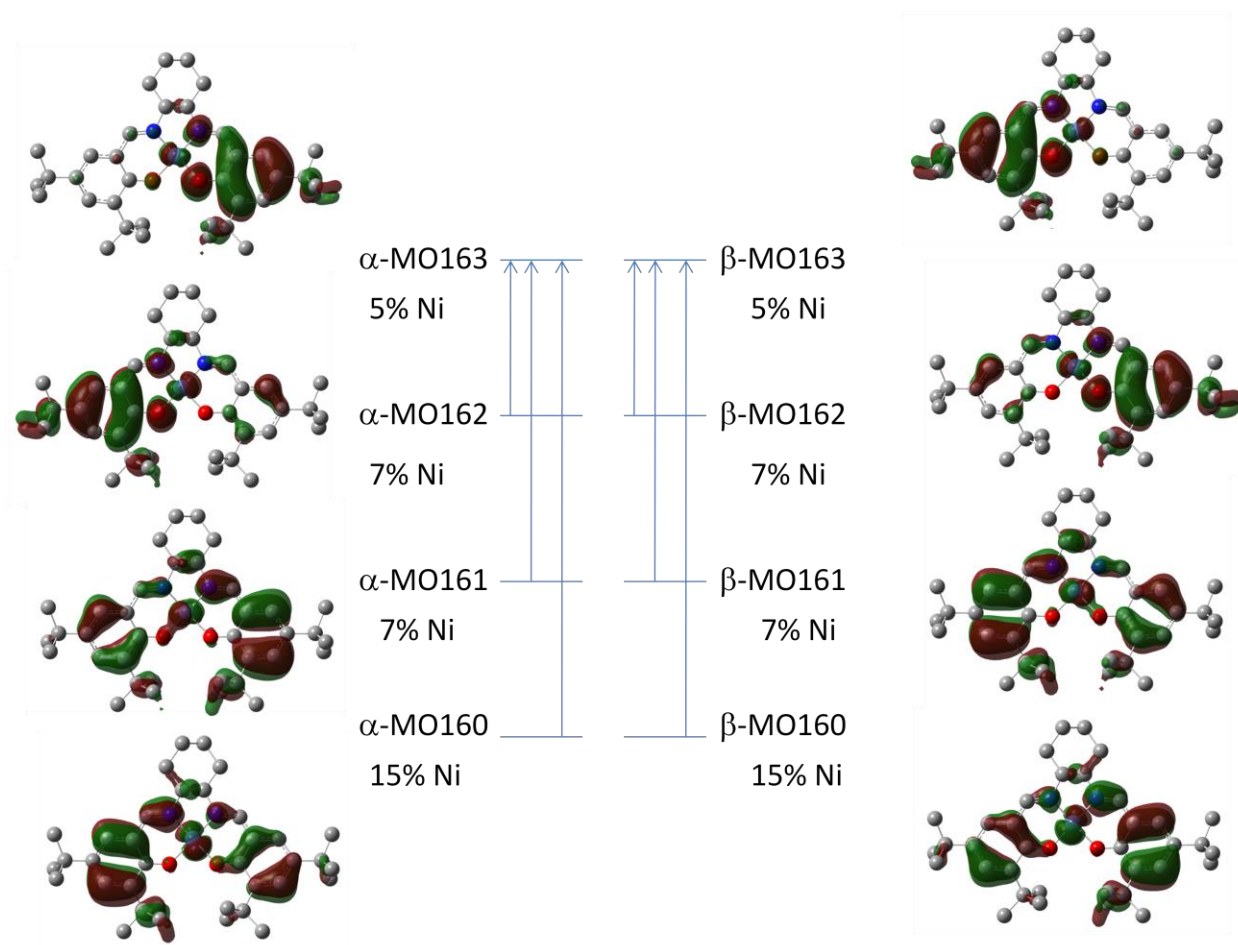

**Fig S4. Partial Kohn-Sham molecular orbital diagram for the broken symmetry solution for  $[1^{**}]^{2+}$  and TD-DFT assignment of the low energy transitions at  $9780\text{ cm}^{-1}$  ( $\alpha/\beta$ -MO162  $\rightarrow$  ( $\alpha/\beta$ -MO163),  $12400\text{ cm}^{-1}$  ( $\alpha/\beta$ -MO161  $\rightarrow$  ( $\alpha/\beta$ -MO163), and  $14300\text{ cm}^{-1}$  ( $\alpha/\beta$ -MO160  $\rightarrow$  ( $\alpha/\beta$ -MO163). Molecular orbital compositions calculated using AOMIX.<sup>1</sup>**

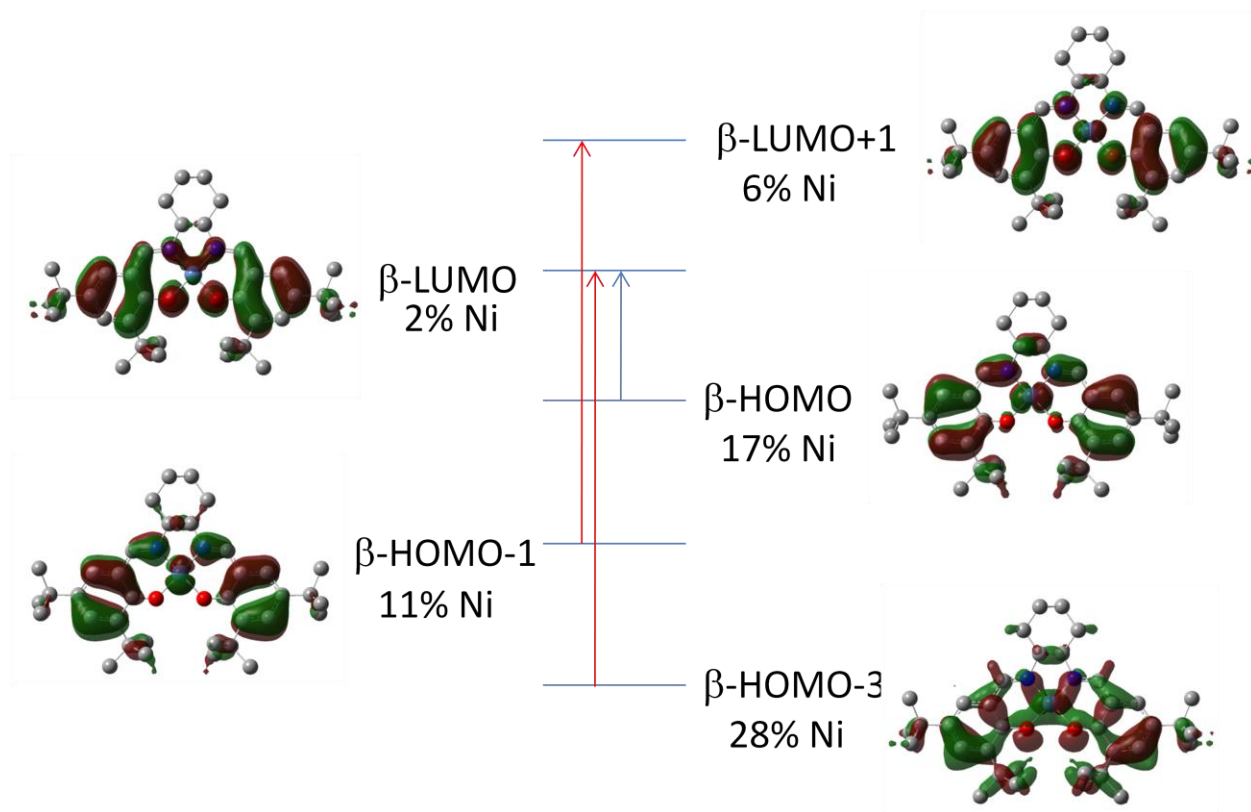

**Fig S5.** Selected Kohn-Sham molecular orbitals of the triplet solution for  $[1^{**}]^{2+}$  and TD-DFT assignment of the low energy transitions at  $10250\text{ cm}^{-1}$  ( $\beta$ -HOMO  $\rightarrow$   $\beta$ -LUMO), and  $13900\text{ cm}^{-1}$  ( $\beta$ -HOMO-1  $\rightarrow$   $\beta$ -LUMO+1 /  $\beta$ -HOMO-3  $\rightarrow$   $\beta$ -LUMO). Molecular orbital compositions calculated using AOMIX.<sup>1</sup>

### 3. Calculation Details

#### A) Optimized XYZ coordinates (Å) for $[1^{**}]^{2+}$ (broken symmetry).

|    |             |             |             |
|----|-------------|-------------|-------------|
| Ni | -0.00001400 | 0.76215100  | -0.00000700 |
| O  | 1.28034800  | -0.57126100 | 0.04528900  |
| O  | -1.28037000 | -0.57126700 | -0.04530900 |
| N  | 1.23880100  | 2.09809500  | -0.29492900 |
| N  | -1.23883600 | 2.09808800  | 0.29492300  |
| C  | 2.56021900  | -0.52019400 | 0.04115600  |
| C  | 3.25050500  | 0.73440700  | -0.20071800 |
| C  | 4.63495300  | 0.77789000  | -0.26530700 |
| C  | 5.42186100  | -0.38324300 | -0.07955700 |
| C  | 4.73415700  | -1.59464300 | 0.19156600  |
| C  | 3.35810000  | -1.72991900 | 0.27167100  |
| C  | 2.52293100  | 1.96486900  | -0.37276200 |
| C  | -2.56024100 | -0.52020400 | -0.04116200 |

|   |             |             |             |
|---|-------------|-------------|-------------|
| C | -3.25053300 | 0.73439100  | 0.20072100  |
| C | -4.63498100 | 0.77786200  | 0.26532000  |
| C | -5.42187800 | -0.38327800 | 0.07957200  |
| C | -4.73416600 | -1.59467100 | -0.19157000 |
| C | -3.35810600 | -1.72993300 | -0.27169700 |
| C | -2.52296500 | 1.96485500  | 0.37276800  |
| C | 0.58573000  | 3.42037800  | -0.49572600 |
| C | -0.58577200 | 3.42037500  | 0.49571800  |
| C | 6.94399300  | -0.36538500 | -0.14655400 |
| C | -6.94401000 | -0.36543800 | 0.14658300  |
| C | 2.70349600  | -3.07700700 | 0.59148500  |
| C | -2.70343700 | -3.07699900 | -0.59150300 |
| C | 1.85175800  | -2.94422200 | 1.88316200  |
| C | 3.74813700  | -4.18451400 | 0.83859800  |
| C | 1.82347200  | -3.51771700 | -0.60789900 |
| C | -1.85167900 | -2.94415300 | -1.88315700 |
| C | -1.82338900 | -3.51763100 | 0.60788800  |
| C | -3.74797200 | -4.18460800 | -0.83863200 |
| H | 5.12053900  | 1.72810500  | -0.45787900 |
| H | 5.33804000  | -2.47694100 | 0.35086900  |
| H | 3.12438900  | 2.84796200  | -0.58113300 |
| H | -5.12057200 | 1.72807100  | 0.45790600  |
| H | -5.33804900 | -2.47696800 | -0.35086200 |
| H | -3.12442500 | 2.84794400  | 0.58114700  |
| H | 0.16337000  | 3.39444700  | -1.51082500 |
| H | -0.16341200 | 3.39444900  | 1.51081700  |
| H | 1.39344300  | -3.91205000 | 2.11112600  |
| H | 1.05432700  | -2.20623200 | 1.78154000  |
| H | 2.47897900  | -2.66617400 | 2.73742200  |
| H | 4.36711800  | -4.38058900 | -0.04390300 |
| H | 3.22450400  | -5.11502900 | 1.07596000  |
| H | 4.40301400  | -3.95755400 | 1.68714300  |
| H | 2.42938300  | -3.64022300 | -1.51241100 |
| H | 1.02587300  | -2.80395600 | -0.81497100 |
| H | 1.36811500  | -4.48704000 | -0.37972800 |
| H | -1.05431900 | -2.20608800 | -1.78151700 |
| H | -2.47890200 | -2.66617000 | -2.73743600 |
| H | -1.39326900 | -3.91194200 | -2.11109800 |
| H | -1.02586400 | -2.80379100 | 0.81497300  |
| H | -1.36793300 | -4.48690900 | 0.37972000  |
| H | -2.42930100 | -3.64019900 | 1.51239200  |
| H | -3.22424500 | -5.11508100 | -1.07595200 |
| H | -4.40283400 | -3.95773200 | -1.68721000 |
| H | -4.36696800 | -4.38072200 | 0.04384900  |
| C | 1.45918600  | 4.66936200  | -0.35198100 |
| H | 2.24097800  | 4.68615000  | -1.11942100 |
| H | 1.95421500  | 4.66292700  | 0.62901500  |
| C | 0.58621900  | 5.93177900  | -0.49390200 |
| H | 1.21129400  | 6.81636300  | -0.33767800 |
| H | 0.20649400  | 5.99700100  | -1.52227000 |
| C | -1.45923600 | 4.66935300  | 0.35197000  |
| H | -1.95426500 | 4.66291200  | -0.62902600 |
| H | -2.24102800 | 4.68613900  | 1.11941000  |
| C | -0.58627700 | 5.93177600  | 0.49388700  |
| H | -1.21135800 | 6.81635600  | 0.33766100  |
| H | -0.20655200 | 5.99700400  | 1.52225500  |

|   |             |             |             |
|---|-------------|-------------|-------------|
| C | -7.50855800 | 1.03322900  | 0.46022700  |
| H | -7.16787600 | 1.40993300  | 1.43173300  |
| H | -7.25359600 | 1.76638800  | -0.31379100 |
| H | -8.60000400 | 0.97995000  | 0.50274800  |
| C | -7.40817700 | -1.34923200 | 1.25732500  |
| H | -8.50195400 | -1.34534000 | 1.29999200  |
| H | -7.08960400 | -2.37825000 | 1.06511400  |
| H | -7.02975200 | -1.04909500 | 2.24009300  |
| C | -7.50981400 | -0.83471700 | -1.22361900 |
| H | -7.19320400 | -1.85005000 | -1.48120000 |
| H | -8.60335800 | -0.83181600 | -1.17538700 |
| H | -7.20458800 | -0.16272000 | -2.03257000 |
| C | 7.50979400  | -0.83465800 | 1.22365100  |
| H | 7.19320400  | -1.84999900 | 1.48122500  |
| H | 8.60333900  | -0.83173300 | 1.17543000  |
| H | 7.20454600  | -0.16267200 | 2.03260200  |
| C | 7.50852400  | 1.03329100  | -0.46018900 |
| H | 7.16785000  | 1.40999000  | -1.43170100 |
| H | 7.25353700  | 1.76644500  | 0.31382400  |
| H | 8.59997100  | 0.98002900  | -0.50269400 |
| C | 7.40818400  | -1.34916800 | -1.25729700 |
| H | 8.50196100  | -1.34525500 | -1.29996000 |
| H | 7.08963000  | -2.37819300 | -1.06508900 |
| H | 7.02975800  | -1.04903600 | -2.24006500 |

**B) TD-DFT excitation energies and oscillator strengths for [1\*\*]<sup>2+</sup>(broken symmetry).**

Excited State 1: 3.578-A 0.5587 eV 2219.15 nm f=0.0000 <S\*\*2>=2.951

|              |          |
|--------------|----------|
| 157A -> 164A | 0.10344  |
| 159A -> 164A | -0.74416 |
| 159A -> 165A | 0.18711  |
| 161A -> 164A | -0.12789 |
| 157B -> 164B | -0.10344 |
| 159B -> 164B | 0.74416  |
| 159B -> 165B | -0.18710 |
| 161B -> 164B | -0.12789 |
| 159A <- 164A | -0.35118 |
| 159B <- 164B | 0.35118  |

This state for optimization and/or second-order correction.

Total Energy, E(TD-HF/TD-KS) = -3171.74545874

Copying the excited state density for this state as the 1-particle RhoCI density.

Excited State 2: 3.435-A 1.0199 eV 1215.65 nm f=0.0000 <S\*\*2>=2.700

|              |          |
|--------------|----------|
| 140A -> 164A | 0.12969  |
| 147A -> 164A | 0.13807  |
| 156A -> 164A | 0.18713  |
| 157A -> 164A | 0.24492  |
| 158A -> 164A | 0.33894  |
| 160A -> 164A | 0.18113  |
| 161A -> 164A | -0.27134 |
| 162A -> 164A | 0.32420  |
| 140B -> 164B | -0.12969 |
| 147B -> 164B | -0.13805 |
| 156B -> 164B | 0.18712  |
| 157B -> 164B | -0.24493 |

158B -> 164B -0.33894  
160B -> 164B -0.18113  
161B -> 164B -0.27134  
162B -> 164B 0.32420  
158A <- 164A 0.10073  
158B <- 164B -0.10072

Excited State 3: 3.550-A 1.1069 eV 1120.07 nm f=0.0000 <S\*\*2>=2.901

156A -> 164A -0.49975  
156A -> 165A 0.12596  
157A -> 164A 0.22172  
160A -> 164A 0.39041  
162A -> 164A -0.13139  
156B -> 164B 0.49976  
156B -> 165B -0.12596  
157B -> 164B 0.22170  
160B -> 164B 0.39041  
162B -> 164B 0.13139  
156A <- 164A -0.13797  
160A <- 164A 0.10115  
156B <- 164B 0.13797  
160B <- 164B 0.10115

Excited State 4: 1.586-A 1.2087 eV 1025.74 nm f=0.0058 <S\*\*2>=0.379

160A -> 163A -0.13376  
161A -> 163A -0.21713  
162A -> 163A 0.65452  
160B -> 163B 0.13403  
161B -> 163B -0.21803  
162B -> 163B 0.65590

Excited State 5: 1.827-A 1.2124 eV 1022.64 nm f=0.1460 <S\*\*2>=0.585

160A -> 163A -0.11581  
161A -> 163A -0.37868  
162A -> 163A 0.57561  
160B -> 163B -0.11548  
161B -> 163B 0.37816  
162B -> 163B -0.57405

Excited State 6: 2.154-A 1.4933 eV 830.27 nm f=0.0116 <S\*\*2>=0.910

159A -> 163A 0.11024  
160A -> 163A 0.35563  
161A -> 163A 0.53419  
162A -> 163A 0.25253  
159B -> 163B -0.11030  
160B -> 163B -0.35565  
161B -> 163B 0.53428  
162B -> 163B 0.25259

Excited State 7: 2.078-A 1.5369 eV 806.73 nm f=0.0488 <S\*\*2>=0.829

159A -> 163A 0.33232  
160A -> 163A 0.17620  
161A -> 163A 0.48818  
162A -> 163A 0.32797  
159B -> 163B 0.33232  
160B -> 163B 0.17612



|                                                                     |          |
|---------------------------------------------------------------------|----------|
| 161B -> 163B                                                        | -0.48809 |
| 162B -> 163B                                                        | -0.32792 |
| Excited State 8: 2.317-A 1.6347 eV 758.47 nm f=0.0146 <S**2>=1.092  |          |
| 158A -> 163A                                                        | -0.15980 |
| 159A -> 163A                                                        | 0.58897  |
| 160A -> 163A                                                        | -0.21808 |
| 161A -> 163A                                                        | -0.18041 |
| 162A -> 163A                                                        | -0.19042 |
| 158B -> 163B                                                        | -0.15984 |
| 159B -> 163B                                                        | 0.58914  |
| 160B -> 163B                                                        | -0.21811 |
| 161B -> 163B                                                        | 0.18041  |
| 162B -> 163B                                                        | 0.19042  |
| Excited State 9: 2.068-A 1.6623 eV 745.87 nm f=0.0009 <S**2>=0.819  |          |
| 158A -> 163A                                                        | -0.14007 |
| 159A -> 163A                                                        | 0.65147  |
| 160A -> 163A                                                        | -0.20719 |
| 158B -> 163B                                                        | 0.14004  |
| 159B -> 163B                                                        | -0.65132 |
| 160B -> 163B                                                        | 0.20713  |
| Excited State 10: 2.246-A 1.7707 eV 700.19 nm f=0.0896 <S**2>=1.011 |          |
| 156A -> 163A                                                        | -0.11530 |
| 157A -> 163A                                                        | 0.13823  |
| 158A -> 163A                                                        | 0.28086  |
| 159A -> 163A                                                        | 0.16735  |
| 159A -> 164A                                                        | 0.18872  |
| 160A -> 163A                                                        | 0.48768  |
| 161A -> 163A                                                        | -0.24953 |
| 162A -> 163A                                                        | -0.10272 |
| 156B -> 163B                                                        | 0.11532  |
| 157B -> 163B                                                        | 0.13822  |
| 158B -> 163B                                                        | 0.28088  |
| 159B -> 163B                                                        | 0.16735  |
| 159B -> 164B                                                        | 0.18872  |
| 160B -> 163B                                                        | 0.48771  |
| 161B -> 163B                                                        | 0.24953  |
| 162B -> 163B                                                        | 0.10272  |
| Excited State 11: 3.571-A 1.9221 eV 645.05 nm f=0.0002 <S**2>=2.938 |          |
| 117A -> 164A                                                        | 0.15154  |
| 137A -> 164A                                                        | 0.13117  |
| 141A -> 164A                                                        | 0.20717  |
| 142A -> 164A                                                        | 0.20893  |
| 143A -> 164A                                                        | -0.36358 |
| 150A -> 164A                                                        | 0.16755  |
| 157A -> 164A                                                        | 0.23850  |
| 158A -> 164A                                                        | -0.27475 |
| 117B -> 164B                                                        | -0.15154 |
| 137B -> 164B                                                        | -0.13118 |
| 141B -> 164B                                                        | -0.20717 |
| 142B -> 164B                                                        | -0.20893 |
| 143B -> 164B                                                        | 0.36358  |
| 150B -> 164B                                                        | -0.16754 |

|                           |           |           |          |              |
|---------------------------|-----------|-----------|----------|--------------|
| 157B -> 164B              | -0.23850  |           |          |              |
| 158B -> 164B              | 0.27475   |           |          |              |
| Excited State 12: 2.245-A | 1.9650 eV | 630.96 nm | f=0.0206 | <S**2>=1.010 |
| 156A -> 163A              | 0.24781   |           |          |              |
| 159A -> 163A              | -0.19505  |           |          |              |
| 160A -> 163A              | -0.49553  |           |          |              |
| 161A -> 163A              | 0.36080   |           |          |              |
| 156B -> 163B              | 0.24782   |           |          |              |
| 159B -> 163B              | 0.19503   |           |          |              |
| 160B -> 163B              | 0.49553   |           |          |              |
| 161B -> 163B              | 0.36078   |           |          |              |
| Excited State 13: 2.387-A | 1.9926 eV | 622.24 nm | f=0.0070 | <S**2>=1.175 |
| 154A -> 163A              | -0.10528  |           |          |              |
| 155A -> 163A              | 0.13780   |           |          |              |
| 157A -> 163A              | -0.35757  |           |          |              |
| 158A -> 163A              | 0.50704   |           |          |              |
| 159A -> 164A              | -0.11764  |           |          |              |
| 160A -> 163A              | -0.15878  |           |          |              |
| 154B -> 163B              | -0.10537  |           |          |              |
| 155B -> 163B              | 0.13789   |           |          |              |
| 157B -> 163B              | -0.35785  |           |          |              |
| 158B -> 163B              | 0.50746   |           |          |              |
| 159B -> 164B              | -0.11764  |           |          |              |
| 160B -> 163B              | -0.15881  |           |          |              |
| Excited State 14: 2.134-A | 2.0270 eV | 611.65 nm | f=0.0002 | <S**2>=0.888 |
| 154A -> 163A              | -0.12205  |           |          |              |
| 155A -> 163A              | 0.17200   |           |          |              |
| 157A -> 163A              | -0.35608  |           |          |              |
| 158A -> 163A              | 0.51516   |           |          |              |
| 159A -> 163A              | 0.10635   |           |          |              |
| 154B -> 163B              | 0.12196   |           |          |              |
| 155B -> 163B              | -0.17184  |           |          |              |
| 157B -> 163B              | 0.35582   |           |          |              |
| 158B -> 163B              | -0.51477  |           |          |              |
| 159B -> 163B              | -0.10629  |           |          |              |
| Excited State 15: 2.227-A | 2.2200 eV | 558.49 nm | f=0.0237 | <S**2>=0.989 |
| 156A -> 163A              | -0.25735  |           |          |              |
| 157A -> 163A              | -0.13195  |           |          |              |
| 159A -> 164A              | 0.56111   |           |          |              |
| 159A -> 165A              | -0.13608  |           |          |              |
| 160A -> 163A              | -0.20443  |           |          |              |
| 156B -> 163B              | 0.25736   |           |          |              |
| 157B -> 163B              | -0.13196  |           |          |              |
| 159B -> 164B              | 0.56111   |           |          |              |
| 159B -> 165B              | -0.13607  |           |          |              |
| 160B -> 163B              | -0.20443  |           |          |              |
| Excited State 16: 2.282-A | 2.3008 eV | 538.87 nm | f=0.0001 | <S**2>=1.051 |
| 147A -> 164A              | -0.10080  |           |          |              |
| 156A -> 163A              | -0.10958  |           |          |              |
| 156A -> 164A              | -0.12829  |           |          |              |
| 157A -> 164A              | -0.21966  |           |          |              |

158A -> 164A -0.27573  
160A -> 164A -0.19826  
161A -> 164A 0.25557  
162A -> 164A -0.40811  
147B -> 164B -0.10079  
156B -> 163B 0.10958  
156B -> 164B 0.12829  
157B -> 164B -0.21967  
158B -> 164B -0.27573  
160B -> 164B -0.19826  
161B -> 164B -0.25557  
162B -> 164B 0.40811

Excited State 17: 2.321-A 2.3611 eV 525.12 nm f=0.0078 <S\*\*2>=1.097

156A -> 163A -0.43409  
157A -> 163A -0.33722  
158A -> 163A -0.22741  
159A -> 164A -0.22174  
160A -> 163A 0.22705  
156B -> 163B 0.43414  
157B -> 163B -0.33725  
158B -> 163B -0.22742  
159B -> 164B -0.22174  
160B -> 163B 0.22703

Excited State 18: 2.302-A 2.4410 eV 507.92 nm f=0.0000 <S\*\*2>=1.075

156A -> 163A 0.52451  
156A -> 164A -0.24566  
157A -> 164A 0.12742  
160A -> 163A 0.16287  
160A -> 164A 0.24207  
161A -> 163A -0.12231  
156B -> 163B 0.52448  
156B -> 164B -0.24566  
157B -> 164B -0.12741  
160B -> 163B -0.16289  
160B -> 164B -0.24208  
161B -> 163B -0.12231

Excited State 19: 2.262-A 2.4648 eV 503.02 nm f=0.0001 <S\*\*2>=1.029

155A -> 163A -0.12465  
156A -> 163A 0.36971  
156A -> 164A 0.34816  
157A -> 164A -0.17895  
160A -> 163A 0.10121  
160A -> 164A -0.32846  
160A -> 165A 0.10912  
162A -> 164A 0.12097  
155B -> 163B 0.12461  
156B -> 163B 0.36968  
156B -> 164B 0.34817  
157B -> 164B 0.17894  
160B -> 163B -0.10121  
160B -> 164B 0.32846  
160B -> 165B -0.10912  
162B -> 164B 0.12097

Excited State 20: 2.132-A 2.6028 eV 476.35 nm f=0.0058 <S\*\*2>=0.886  
156A -> 163A -0.44058  
157A -> 163A 0.39588  
158A -> 163A 0.21626  
159A -> 164A -0.17334  
160A -> 163A -0.21192  
156B -> 163B 0.44059  
157B -> 163B 0.39588  
158B -> 163B 0.21626  
159B -> 164B -0.17334  
160B -> 163B -0.21192

Excited State 21: 2.185-A 2.6561 eV 466.79 nm f=0.0028 <S\*\*2>=0.943  
155A -> 163A -0.14428  
157A -> 163A 0.50945  
158A -> 163A 0.40360  
160A -> 163A -0.14160  
155B -> 163B 0.14425  
157B -> 163B -0.50945  
158B -> 163B -0.40357  
160B -> 163B 0.14159

Excited State 22: 2.200-A 2.7960 eV 443.44 nm f=0.0366 <S\*\*2>=0.960  
117A -> 164A 0.13472  
137A -> 164A 0.13028  
141A -> 164A 0.20306  
142A -> 164A 0.20176  
143A -> 164A -0.34693  
150A -> 164A 0.16311  
157A -> 164A 0.24101  
158A -> 164A -0.29395  
117B -> 164B 0.13472  
137B -> 164B 0.13029  
141B -> 164B 0.20306  
142B -> 164B 0.20176  
143B -> 164B -0.34693  
150B -> 164B 0.16310  
157B -> 164B 0.24100  
158B -> 164B -0.29396

Excited State 23: 2.138-A 2.8492 eV 435.15 nm f=0.0069 <S\*\*2>=0.893  
150A -> 163A 0.12105  
155A -> 163A 0.63660  
157A -> 163A 0.13888  
150B -> 163B 0.12082  
155B -> 163B 0.63497  
157B -> 163B 0.13819

Excited State 24: 2.382-A 2.8542 eV 434.39 nm f=0.0001 <S\*\*2>=1.169  
155A -> 163A -0.61186  
157A -> 163A -0.22372  
155B -> 163B 0.61361  
157B -> 163B 0.22403

Excited State 25: 2.347-A 2.9747 eV 416.80 nm f=0.0003 <S\*\*2>=1.127

|              |          |
|--------------|----------|
| 143A -> 163A | -0.10020 |
| 150A -> 163A | -0.19242 |
| 152A -> 163A | 0.28609  |
| 153A -> 163A | -0.15785 |
| 154A -> 163A | -0.54962 |
| 157A -> 163A | 0.10895  |
| 143B -> 163B | 0.10085  |
| 150B -> 163B | 0.19326  |
| 152B -> 163B | -0.28762 |
| 153B -> 163B | -0.15855 |
| 154B -> 163B | 0.55254  |
| 157B -> 163B | -0.10937 |

Excited State 26: 2.202-A 2.9798 eV 416.09 nm f=0.0054 <S\*\*2>=0.963

|              |          |
|--------------|----------|
| 143A -> 163A | 0.12371  |
| 150A -> 163A | 0.17593  |
| 152A -> 163A | -0.30848 |
| 153A -> 163A | 0.14529  |
| 154A -> 163A | 0.55460  |
| 143B -> 163B | 0.12320  |
| 150B -> 163B | 0.17487  |
| 152B -> 163B | -0.30694 |
| 153B -> 163B | -0.14443 |
| 154B -> 163B | 0.55181  |

Excited State 27: 2.462-A 3.0556 eV 405.77 nm f=0.1044 <S\*\*2>=1.265

|              |          |
|--------------|----------|
| 140A -> 163A | -0.16303 |
| 147A -> 163A | -0.20953 |
| 150A -> 163A | -0.10375 |
| 151A -> 163A | -0.41141 |
| 153A -> 163A | 0.28455  |
| 155A -> 163A | -0.10100 |
| 160A -> 165A | -0.14962 |
| 161A -> 166A | 0.11143  |
| 162A -> 165A | 0.20802  |
| 140B -> 163B | -0.16304 |
| 147B -> 163B | -0.20952 |
| 150B -> 163B | -0.10375 |
| 151B -> 163B | 0.41149  |
| 153B -> 163B | -0.28458 |
| 155B -> 163B | -0.10102 |
| 160B -> 165B | -0.14961 |
| 161B -> 166B | -0.11145 |
| 162B -> 165B | -0.20802 |

Excited State 28: 2.505-A 3.0967 eV 400.37 nm f=0.0000 <S\*\*2>=1.318

|              |          |
|--------------|----------|
| 140A -> 163A | 0.14849  |
| 147A -> 163A | 0.18250  |
| 151A -> 163A | 0.45956  |
| 153A -> 163A | -0.27547 |
| 155A -> 163A | 0.10064  |
| 160A -> 165A | -0.14442 |
| 161A -> 165A | 0.11788  |
| 161A -> 166A | -0.11824 |
| 162A -> 165A | 0.10414  |
| 140B -> 163B | -0.14846 |

|              |          |
|--------------|----------|
| 147B -> 163B | -0.18244 |
| 151B -> 163B | 0.45951  |
| 153B -> 163B | -0.27541 |
| 155B -> 163B | -0.10063 |
| 160B -> 165B | 0.14443  |
| 161B -> 165B | 0.11789  |
| 161B -> 166B | -0.11822 |
| 162B -> 165B | 0.10418  |

Excited State 29: 2.305-A 3.1564 eV 392.80 nm f=0.0029 <S\*\*2>=1.079

|              |          |
|--------------|----------|
| 142A -> 163A | 0.10076  |
| 148A -> 163A | -0.10335 |
| 149A -> 163A | -0.21178 |
| 150A -> 163A | 0.54284  |
| 152A -> 163A | 0.20023  |
| 153A -> 163A | 0.19173  |
| 154A -> 163A | -0.16077 |
| 155A -> 163A | -0.11248 |
| 142B -> 163B | 0.10089  |
| 148B -> 163B | -0.10349 |
| 149B -> 163B | -0.21209 |
| 150B -> 163B | 0.54360  |
| 152B -> 163B | 0.20054  |
| 153B -> 163B | -0.19199 |
| 154B -> 163B | -0.16099 |
| 155B -> 163B | -0.11260 |

Excited State 30: 2.254-A 3.1581 eV 392.59 nm f=0.0005 <S\*\*2>=1.020

|              |          |
|--------------|----------|
| 149A -> 163A | -0.23642 |
| 150A -> 163A | 0.53805  |
| 152A -> 163A | 0.21744  |
| 153A -> 163A | 0.16862  |
| 154A -> 163A | -0.18851 |
| 149B -> 163B | 0.23611  |
| 150B -> 163B | -0.53731 |
| 152B -> 163B | -0.21714 |
| 153B -> 163B | 0.16837  |
| 154B -> 163B | 0.18825  |

**C) Optimized XYZ coordinates (Å) for [1\*\*]<sup>2+</sup>(triplet).**

|    |             |             |             |
|----|-------------|-------------|-------------|
| Ni | 0.00007045  | 0.75964170  | 0.00003801  |
| O  | -1.28234476 | -0.57684337 | -0.04930790 |
| O  | 1.28222339  | -0.57701264 | 0.04842518  |
| N  | -1.23915917 | 2.09729642  | 0.29934317  |
| N  | 1.23916972  | 2.09726804  | -0.29908212 |
| C  | -2.56178410 | -0.52157436 | -0.04365316 |
| C  | -3.24987774 | 0.73154087  | 0.20391892  |
| C  | -4.63357553 | 0.77555039  | 0.26989512  |
| C  | -5.42443691 | -0.38527591 | 0.08143795  |
| C  | -4.73945143 | -1.59449578 | -0.19702582 |
| C  | -3.36258979 | -1.72960846 | -0.28011511 |
| C  | -2.52214251 | 1.96359081  | 0.37813931  |
| C  | 2.56171150  | -0.52179491 | 0.04346007  |
| C  | 3.24977582  | 0.73136210  | -0.20396301 |
| C  | 4.63346853  | 0.77547923  | -0.26976453 |

|   |             |             |             |
|---|-------------|-------------|-------------|
| C | 5.42437970  | -0.38527536 | -0.08122664 |
| C | 4.73946522  | -1.59454398 | 0.19719864  |
| C | 3.36257558  | -1.72978128 | 0.28029565  |
| C | 2.52210947  | 1.96343968  | -0.37830601 |
| C | -0.58390218 | 3.41884926  | 0.49807518  |
| C | 0.58387648  | 3.41876207  | -0.49805480 |
| C | -6.94636142 | -0.36378957 | 0.15356294  |
| C | 6.94632930  | -0.36356444 | -0.15294129 |
| C | -2.70907309 | -3.07446011 | -0.60935869 |
| C | 2.70915384  | -3.07494689 | 0.60902061  |
| C | -1.85335390 | -2.93371120 | -1.89786776 |
| C | -3.75426394 | -4.17904973 | -0.86741464 |
| C | -1.83149212 | -3.52529569 | 0.58844879  |
| C | 1.85346259  | -2.93494426 | 1.89764536  |
| C | 1.83154173  | -3.52494870 | -0.58912107 |
| C | 3.75429331  | -4.17967541 | 0.86667519  |
| H | -5.11855330 | 1.72544962  | 0.46588920  |
| H | -5.34363467 | -2.47592119 | -0.36021641 |
| H | -3.12446122 | 2.84591159  | 0.58789914  |
| H | 5.11839121  | 1.72538800  | -0.46583607 |
| H | 5.34373537  | -2.47589080 | 0.36042761  |
| H | 3.12442089  | 2.84563893  | -0.58858287 |
| H | -0.15790235 | 3.39221643  | 1.51176710  |
| H | 0.15785919  | 3.39197325  | -1.51173189 |
| H | -1.40162368 | -3.90251129 | -2.13456089 |
| H | -1.05101332 | -2.20258517 | -1.78621640 |
| H | -2.47637682 | -2.64271398 | -2.75091121 |
| H | -4.37527828 | -4.38186572 | 0.01212496  |
| H | -3.23109287 | -5.10813918 | -1.11123831 |
| H | -4.40728493 | -3.94465339 | -1.71539782 |
| H | -2.43909075 | -3.65481982 | 1.49082955  |
| H | -1.03384837 | -2.81358485 | 0.80239605  |
| H | -1.37662607 | -4.49306155 | 0.35273160  |
| H | 1.05153366  | -2.20335485 | 1.78667516  |
| H | 2.47677436  | -2.64495312 | 2.75082551  |
| H | 1.40135555  | -3.90375035 | 2.13360217  |
| H | 1.03416157  | -2.81276297 | -0.80244534 |
| H | 1.37636581  | -4.49273193 | -0.35403951 |
| H | 2.43913881  | -3.65397759 | -1.49155816 |
| H | 3.23112861  | -5.10884877 | 1.11010760  |
| H | 4.40699347  | -3.94523334 | 1.71486622  |
| H | 4.37547507  | -4.38208143 | -0.01283125 |
| C | -1.45737217 | 4.66821879  | 0.35806487  |
| H | -2.23630387 | 4.68466830  | 1.12845764  |
| H | -1.95620295 | 4.66186612  | -0.62103479 |
| C | -0.58407305 | 5.93066438  | 0.49632871  |
| H | -1.20978698 | 6.81528601  | 0.34278228  |
| H | -0.19979770 | 5.99600459  | 1.52300340  |
| C | 1.45736136  | 4.66817776  | -0.35826881 |
| H | 1.95625096  | 4.66192152  | 0.62080125  |
| H | 2.23624980  | 4.68453464  | -1.12870618 |
| C | 0.58406426  | 5.93060124  | -0.49665707 |
| H | 1.20977413  | 6.81524828  | -0.34323054 |
| H | 0.19976889  | 5.99582493  | -1.52333304 |
| C | 7.50645331  | 1.03464211  | -0.47659299 |
| H | 7.16150679  | 1.40522268  | -1.44897129 |

|   |             |             |             |
|---|-------------|-------------|-------------|
| H | 7.25303297  | 1.77166492  | 0.29427641  |
| H | 8.59784149  | 0.98339387  | -0.52283371 |
| C | 7.41047818  | -1.35285817 | -1.25873849 |
| H | 8.50412663  | -1.34674376 | -1.30394652 |
| H | 7.09462149  | -2.38134716 | -1.05938246 |
| H | 7.02915295  | -1.05968879 | -2.24251043 |
| C | 7.51722323  | -0.82270109 | 1.21867786  |
| H | 7.20354294  | -1.83711107 | 1.48340851  |
| H | 8.61062254  | -0.81752483 | 1.16749719  |
| H | 7.21261203  | -0.14630414 | 2.02420578  |
| C | -7.51754201 | -0.82265527 | -1.21804631 |
| H | -7.20381726 | -1.83696088 | -1.48312111 |
| H | -8.61093227 | -0.81761516 | -1.16662309 |
| H | -7.21320487 | -0.14601856 | -2.02347696 |
| C | -7.50661122 | 1.03424963  | 0.47772264  |
| H | -7.16100841 | 1.40488000  | 1.44984866  |
| H | -7.25398993 | 1.77137575  | -0.29330928 |
| H | -8.59794811 | 0.98269357  | 0.52478121  |
| C | -7.41005907 | -1.35345012 | 1.25919801  |
| H | -8.50369418 | -1.34749120 | 1.30471888  |
| H | -7.09411787 | -2.38183903 | 1.05945019  |
| H | -7.02848878 | -1.06051392 | 2.24294492  |

**D) TD-DFT excitation energies and oscillator strengths for  $[1^{\bullet\bullet}]^{2+}$  (triplet).**

Excited State 1: 4.134-A 0.4952 eV 2503.76 nm  $f=0.0001$   $\langle S^{*2} \rangle = 4.023$

|              |          |
|--------------|----------|
| 159A -> 164A | -0.64205 |
| 159A -> 165A | -0.21109 |
| 161A -> 164A | -0.42262 |
| 161A -> 165A | -0.13716 |
| 157B -> 164B | -0.13807 |
| 159B -> 164B | 0.77785  |
| 159B -> 165B | 0.12719  |
| 159A <- 164A | -0.32318 |
| 159A <- 165A | -0.10715 |
| 161A <- 164A | -0.21187 |
| 159B <- 164B | 0.40004  |

This state for optimization and/or second-order correction.

Total Energy, E(TD-HF/TD-KS) = -3171.74663748

Copying the excited state density for this state as the 1-particle RhoCI density.

Excited State 2: 3.976-A 0.9301 eV 1333.04 nm  $f=0.0000$   $\langle S^{*2} \rangle = 3.702$

|              |          |
|--------------|----------|
| 140A -> 164A | -0.11242 |
| 144A -> 164A | 0.11033  |
| 147A -> 164A | -0.17305 |
| 156A -> 164A | -0.41016 |
| 156A -> 165A | -0.13335 |
| 158A -> 164A | -0.24657 |
| 161A -> 164A | 0.22463  |
| 163A -> 164A | -0.43211 |
| 163A -> 165A | -0.13828 |
| 139B -> 164B | 0.11919  |
| 148B -> 164B | 0.14760  |
| 157B -> 164B | 0.19499  |
| 158B -> 164B | 0.38297  |
| 161B -> 164B | 0.46531  |



|                                                                     |          |
|---------------------------------------------------------------------|----------|
| 156A <- 164A                                                        | -0.12395 |
| 163A <- 164A                                                        | -0.10123 |
| 158B <- 164B                                                        | 0.12990  |
| 161B <- 164B                                                        | 0.14873  |
| Excited State 3: 4.113-A 1.0845 eV 1143.21 nm f=0.0000 <S**2>=3.979 |          |
| 157A -> 164A                                                        | -0.53919 |
| 157A -> 165A                                                        | -0.17837 |
| 160A -> 164A                                                        | 0.38151  |
| 160A -> 165A                                                        | 0.12499  |
| 162A -> 164A                                                        | -0.19427 |
| 156B -> 164B                                                        | 0.56976  |
| 160B -> 164B                                                        | 0.39881  |
| 157A <- 164A                                                        | -0.14974 |
| 156B <- 164B                                                        | 0.16513  |
| 160B <- 164B                                                        | 0.10645  |
| Excited State 4: 3.037-A 1.2704 eV 975.94 nm f=0.0637 <S**2>=2.056  |          |
| 159B -> 162B                                                        | -0.10361 |
| 160B -> 163B                                                        | -0.39332 |
| 161B -> 162B                                                        | 0.89939  |
| Excited State 5: 3.033-A 1.3569 eV 913.74 nm f=0.0151 <S**2>=2.050  |          |
| 158B -> 163B                                                        | 0.11685  |
| 159B -> 163B                                                        | 0.11319  |
| 160B -> 162B                                                        | 0.86126  |
| 161B -> 163B                                                        | -0.46054 |
| Excited State 6: 3.030-A 1.5534 eV 798.13 nm f=0.0127 <S**2>=2.045  |          |
| 158B -> 162B                                                        | -0.17875 |
| 159B -> 162B                                                        | 0.96795  |
| Excited State 7: 3.029-A 1.6370 eV 757.39 nm f=0.0002 <S**2>=2.043  |          |
| 158B -> 163B                                                        | -0.22145 |
| 159B -> 163B                                                        | 0.94581  |
| 160B -> 162B                                                        | -0.15004 |
| 161B -> 163B                                                        | -0.10053 |
| Excited State 8: 3.025-A 1.7222 eV 719.94 nm f=0.1241 <S**2>=2.038  |          |
| 159A -> 164A                                                        | 0.13137  |
| 156B -> 163B                                                        | 0.16542  |
| 158B -> 162B                                                        | 0.68079  |
| 159B -> 162B                                                        | 0.13375  |
| 159B -> 164B                                                        | 0.15309  |
| 160B -> 163B                                                        | 0.55510  |
| 161B -> 162B                                                        | 0.30140  |
| Excited State 9: 3.026-A 1.8514 eV 669.69 nm f=0.0102 <S**2>=2.039  |          |
| 158B -> 163B                                                        | 0.29035  |
| 159B -> 163B                                                        | 0.22585  |
| 160B -> 162B                                                        | 0.38202  |
| 161B -> 163B                                                        | 0.81874  |
| Excited State 10: 3.029-A 1.8896 eV 656.14 nm f=0.0165 <S**2>=2.044 |          |
| 159A -> 164A                                                        | -0.16125 |
| 161A -> 164A                                                        | -0.11818 |

155B -> 163B 0.16169  
156B -> 163B -0.33647  
157B -> 162B -0.48980  
158B -> 162B 0.49285  
159B -> 162B 0.15774  
159B -> 164B -0.17731  
160B -> 163B -0.45407  
161B -> 162B -0.16814

Excited State 11: 4.131-A 1.8968 eV 653.64 nm f=0.0000 <S\*\*2>=4.016

117A -> 164A -0.14566  
136A -> 164A 0.12750  
142A -> 164A 0.27015  
143A -> 164A 0.38502  
143A -> 165A 0.12654  
148A -> 164A 0.12412  
150A -> 164A 0.18365  
156A -> 164A -0.16861  
158A -> 164A 0.32585  
158A -> 165A 0.10621  
117B -> 164B 0.14853  
137B -> 164B -0.11924  
141B -> 164B -0.25881  
143B -> 164B -0.39493  
150B -> 164B -0.19226  
157B -> 164B 0.32699  
158B -> 164B -0.22118

Excited State 12: 3.030-A 2.0433 eV 606.77 nm f=0.0063 <S\*\*2>=2.046

154B -> 162B -0.16869  
155B -> 162B 0.33789  
156B -> 162B -0.42925  
157B -> 163B -0.41242  
158B -> 163B 0.58475  
159B -> 163B 0.11981  
160B -> 162B -0.17636  
161B -> 163B -0.20591

Excited State 13: 3.029-A 2.1037 eV 589.37 nm f=0.0477 <S\*\*2>=2.044

159A -> 164A -0.19740  
161A -> 164A -0.11935  
155B -> 163B -0.15004  
156B -> 163B -0.38057  
157B -> 162B 0.73935  
158B -> 162B 0.34498  
159B -> 164B -0.24098

Excited State 14: 3.030-A 2.1719 eV 570.85 nm f=0.0061 <S\*\*2>=2.046

154B -> 162B -0.11367  
155B -> 162B 0.27253  
156B -> 162B 0.77086  
157B -> 163B -0.49269  
161B -> 163B -0.11471

Excited State 15: 3.052-A 2.2104 eV 560.92 nm f=0.0017 <S\*\*2>=2.079

156A -> 164A 0.14025

|              |          |
|--------------|----------|
| 158A -> 164A | 0.14139  |
| 159A -> 164A | 0.39715  |
| 159A -> 165A | 0.12489  |
| 161A -> 164A | 0.14836  |
| 163A -> 164A | 0.32500  |
| 163A -> 165A | 0.14543  |
| 157B -> 162B | 0.19241  |
| 158B -> 162B | 0.13699  |
| 158B -> 164B | 0.17608  |
| 159B -> 164B | 0.51784  |
| 160B -> 163B | -0.33367 |
| 161B -> 162B | -0.11020 |
| 161B -> 164B | 0.31793  |

Excited State 16: 3.053-A 2.2435 eV 552.64 nm f=0.0001 <S\*\*2>=2.081

|              |          |
|--------------|----------|
| 156A -> 164A | 0.22692  |
| 158A -> 164A | 0.11409  |
| 159A -> 164A | -0.20333 |
| 161A -> 164A | -0.32386 |
| 163A -> 164A | 0.38331  |
| 148B -> 164B | 0.10387  |
| 157B -> 162B | -0.11221 |
| 157B -> 164B | 0.21007  |
| 158B -> 162B | -0.14135 |
| 158B -> 164B | 0.34273  |
| 159B -> 164B | -0.27695 |
| 160B -> 163B | 0.30513  |
| 161B -> 162B | 0.11142  |
| 161B -> 164B | 0.43181  |

Excited State 17: 3.024-A 2.4372 eV 508.72 nm f=0.0000 <S\*\*2>=2.036

|              |          |
|--------------|----------|
| 157A -> 164A | 0.44064  |
| 157A -> 165A | 0.13957  |
| 160A -> 164A | -0.34983 |
| 160A -> 165A | -0.11091 |
| 162A -> 164A | 0.23576  |
| 155B -> 162B | 0.28647  |
| 156B -> 164B | 0.51343  |
| 160B -> 164B | 0.41207  |

Excited State 18: 3.028-A 2.5346 eV 489.17 nm f=0.0015 <S\*\*2>=2.042

|              |          |
|--------------|----------|
| 155B -> 162B | -0.29224 |
| 156B -> 162B | 0.43819  |
| 157B -> 163B | 0.35200  |
| 158B -> 163B | 0.67207  |
| 160B -> 162B | -0.21724 |
| 161B -> 163B | -0.16080 |

Excited State 19: 3.027-A 2.5561 eV 485.05 nm f=0.0113 <S\*\*2>=2.040

|              |          |
|--------------|----------|
| 159A -> 164A | -0.12900 |
| 161A -> 164A | -0.10443 |
| 156B -> 163B | 0.82613  |
| 157B -> 162B | 0.16944  |
| 158B -> 162B | 0.24724  |
| 159B -> 164B | -0.18365 |
| 160B -> 163B | -0.32936 |

161B -> 162B -0.15629

Excited State 20: 3.029-A 2.7225 eV 455.41 nm f=0.0001 <S\*\*2>=2.044

150B -> 163B -0.13805  
154B -> 162B 0.15545  
155B -> 162B 0.75923  
156B -> 164B -0.10997  
157B -> 163B 0.53797

Excited State 21: 3.025-A 2.7759 eV 446.65 nm f=0.0352 <S\*\*2>=2.037

117A -> 164A 0.12618  
136A -> 164A -0.12672  
142A -> 164A -0.25910  
143A -> 164A -0.35802  
143A -> 165A -0.11730  
148A -> 164A -0.11864  
150A -> 164A -0.17428  
156A -> 164A 0.13836  
158A -> 164A -0.34559  
158A -> 165A -0.11262  
117B -> 164B 0.13421  
137B -> 164B -0.12146  
141B -> 164B -0.25863  
143B -> 164B -0.38570  
150B -> 164B -0.19377  
157B -> 164B 0.34592  
158B -> 164B -0.22406

Excited State 22: 3.026-A 2.8606 eV 433.41 nm f=0.0002 <S\*\*2>=2.039

143B -> 163B 0.14079  
149B -> 162B 0.17871  
151B -> 163B -0.26609  
154B -> 162B 0.86876  
157B -> 163B -0.27440

Excited State 23: 3.053-A 2.9051 eV 426.78 nm f=0.0311 <S\*\*2>=2.080

143B -> 162B -0.12734  
148B -> 162B -0.27999  
150B -> 162B -0.15492  
152B -> 163B -0.18223  
153B -> 162B -0.51961  
154B -> 163B -0.10681  
155B -> 163B 0.66199  
157B -> 162B 0.21744

Excited State 24: 3.131-A 2.9537 eV 419.76 nm f=0.0004 <S\*\*2>=2.201

160A -> 165A -0.13949  
161A -> 166A -0.15452  
162A -> 165A 0.16873  
163A -> 166A -0.12244  
140B -> 162B -0.16348  
148B -> 163B 0.23719  
150B -> 163B -0.13465  
152B -> 162B 0.80351  
153B -> 163B 0.16930

Excited State 25: 3.028-A 2.9727 eV 417.08 nm f=0.0064  $\langle S^{*2} \rangle = 2.042$   
143B -> 162B -0.14870  
147B -> 162B 0.12163  
149B -> 163B -0.13679  
150B -> 162B 0.42377  
151B -> 162B 0.68439  
152B -> 163B -0.10544  
154B -> 163B -0.48195  
155B -> 163B -0.10274

Excited State 26: 3.113-A 3.0137 eV 411.40 nm f=0.0624  $\langle S^{*2} \rangle = 2.173$   
160A -> 166A 0.12024  
161A -> 165A 0.12364  
162A -> 166A -0.13872  
139B -> 162B 0.13860  
143B -> 162B -0.14826  
148B -> 162B 0.35653  
150B -> 162B -0.33208  
151B -> 162B 0.16673  
152B -> 163B 0.27362  
153B -> 162B 0.41971  
154B -> 163B -0.21862  
155B -> 163B 0.46057  
157B -> 162B 0.11130  
161B -> 165B 0.11643

Excited State 27: 3.031-A 3.0795 eV 402.62 nm f=0.0056  $\langle S^{*2} \rangle = 2.046$   
147B -> 162B 0.17136  
149B -> 163B -0.37417  
150B -> 162B 0.58837  
151B -> 162B -0.42923  
153B -> 162B 0.31360  
155B -> 163B 0.34369  
157B -> 162B 0.12971

Excited State 28: 3.028-A 3.1062 eV 399.15 nm f=0.0004  $\langle S^{*2} \rangle = 2.043$   
146B -> 162B -0.12911  
147B -> 163B -0.10931  
149B -> 162B 0.83749  
150B -> 163B -0.32470  
151B -> 163B 0.19687  
152B -> 162B -0.10459  
153B -> 163B -0.15393  
154B -> 162B -0.18499

Excited State 29: 3.219-A 3.1309 eV 396.00 nm f=0.0096  $\langle S^{*2} \rangle = 2.341$   
160A -> 166A -0.16009  
161A -> 165A -0.14736  
162A -> 166A -0.26662  
163A -> 164A -0.29139  
163A -> 165A 0.75986  
138B -> 162B 0.11084  
145B -> 162B -0.17476  
150B -> 162B 0.12461  
153B -> 162B -0.10278  
160B -> 166B -0.16804

161B -> 165B -0.14918

Excited State 30: 3.328-A 3.1850 eV 389.28 nm f=0.0441 <S\*\*2>=2.519

160A -> 164A 0.10136

160A -> 165A -0.21154

161A -> 166A -0.16581

162A -> 164A 0.13012

162A -> 165A -0.23886

163A -> 166A 0.78144

144B -> 162B -0.13914

160B -> 165B -0.22869

161B -> 166B -0.19341

#### **4. References**

1. (a) S. I. Gorelsky, *AOMix: Program for Molecular Orbital Analysis*, <http://www.sg-chem.net/> 2007, **University of Ottawa, Canada**; (b) S. I. Gorelsky and A. B. P. Lever, *J. Organomet. Chem.*, 2001, **635**, 187; (c) S. I. Gorelsky and E. I. Solomon, *Theoretical Chem. Acc.*, 2008, **119**, 57.
